# Supplementary material for: Design and Synthesis of Coumarin Derivatives as Cytotoxic Agents through PI3K/AKT Signaling Pathway Inhibition in HL60 and HepG2 Cancer Cells
Source: Molecules. 2022 Oct 9;27(19):6709. doi: 10.3390/molecules27196709 (PMC9571264; doi:10.3390/molecules27196709)
Supplement: Supplementary file 1 [file molecules-27-06709-s001.zip › molecules-1862399-supplementary.pdf]

# Design and Synthesis of Coumarin Derivatives as Cytotoxic Agents through PI3K/AKT Signaling Pathway Inhibition in HL60 and HepG2 Cancer Cells

## Table of content

| Item                                                                                                                | Page No. |
|---------------------------------------------------------------------------------------------------------------------|----------|
| Fig. S1. <sup>1</sup> H NMR of compound (3)                                                                         | 2        |
| Fig. S2. <sup>13</sup> C NMR of compound (3)                                                                        | 2        |
| Fig. S3. <sup>1</sup> H NMR of compound (4)                                                                         | 3        |
| Fig. S4. <sup>13</sup> C NMR of compound (4)                                                                        | 3        |
| Fig. S5. <sup>1</sup> H NMR of Cinnamaldehyde (5)                                                                   | 4        |
| Fig. S6. <sup>13</sup> C NMR of Cinnamaldehyde (5)                                                                  | 4        |
| Fig. S7. <sup>1</sup> H NMR of Cinnamic Acid (6)                                                                    | 5        |
| Fig. S8. <sup>13</sup> C NMR of Cinnamic Acid (6)                                                                   | 5        |
| Fig. S9. <sup>1</sup> H NMR of compound (8a)                                                                        | 6        |
| Fig. S10. <sup>13</sup> C NMR of compound (8a)                                                                      | 6        |
| Fig. S11. NOST of compound (8a)                                                                                     | 7        |
| Fig. S12. COSY of compound (8a)                                                                                     | 7        |
| Fig. S13. HMBC of compound (8a)                                                                                     | 8        |
| Fig. S14. HSQC of compound (8a)                                                                                     | 8        |
| Fig. S15. <sup>1</sup> H NMR of compound (8b)                                                                       | 9        |
| Fig. S16. <sup>13</sup> C NMR of compound (8b)                                                                      | 9        |
| Fig. S17. <sup>1</sup> H NMR of compound (8c)                                                                       | 10       |
| Fig. S18. <sup>13</sup> C NMR of compound (8c)                                                                      | 10       |
| Supplementary materials for detailed methodology                                                                    | 11       |
| 2.2.2.1. Flow cytometric analysis                                                                                   | 11       |
| 2.2.2.3. Immunoblotting (Western blotting) for PI3K and AKT                                                         | 12       |
| 2.3.1. Table S1. Docked interaction analysis of synthesized ligands screened with the two proteins (PI3K and AKT1). | 12       |

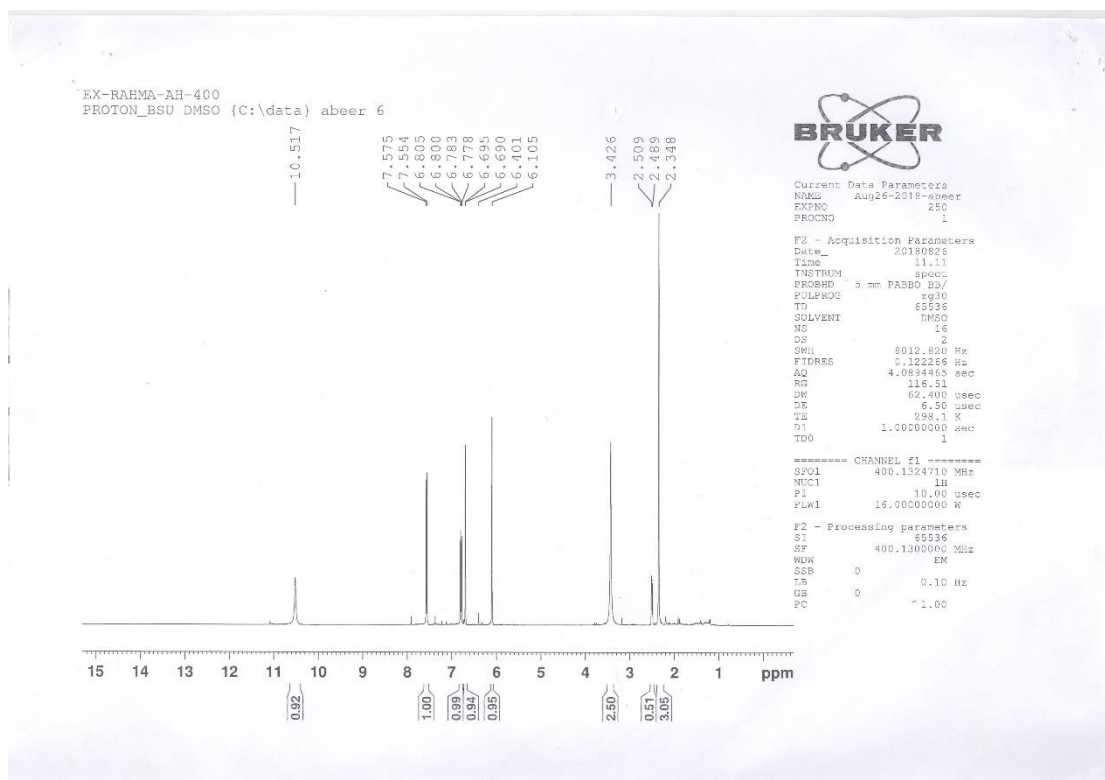

Fig. S1.  $^1\text{H}$  NMR of Compound (3)

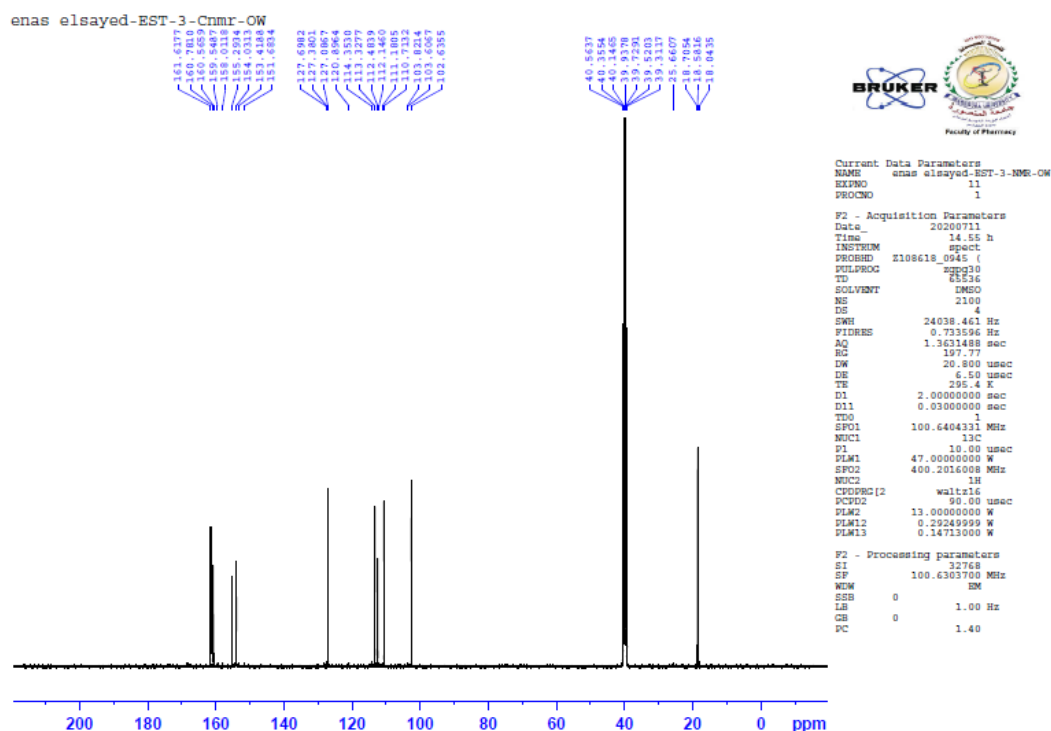

Fig. S2.  $^{13}\text{C}$  NMR of Compound (3)

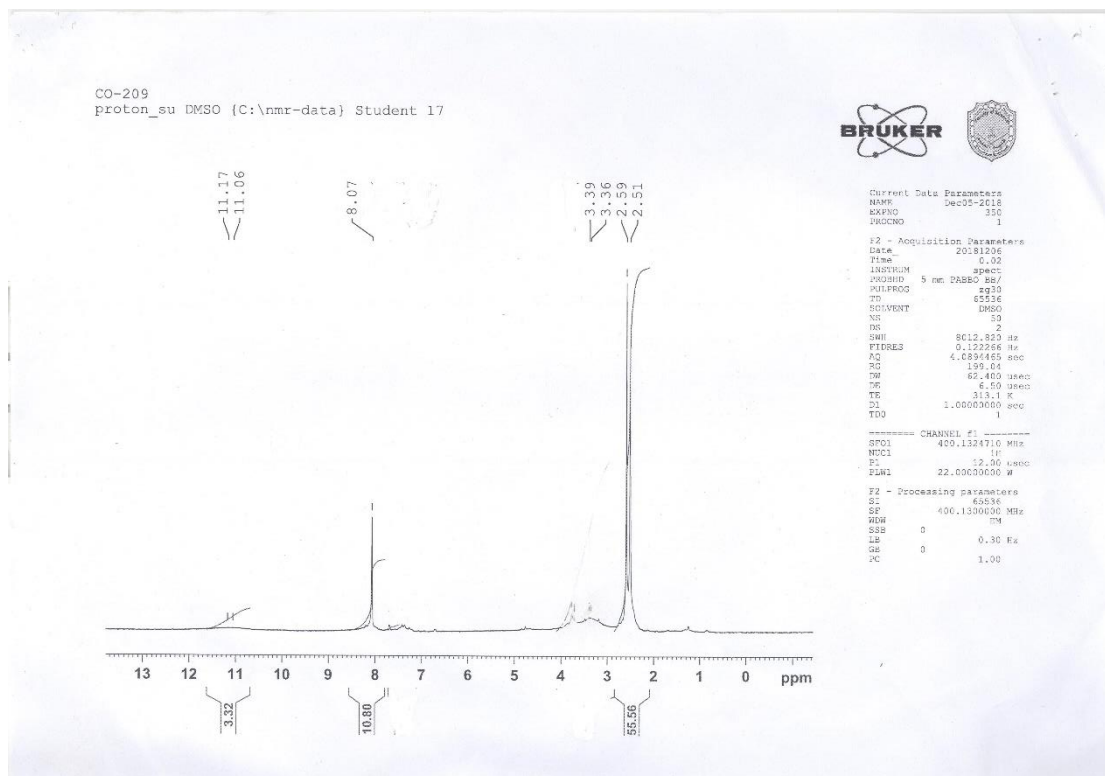

Fig. S3.  $^1\text{H}$  NMR of Compound (4)

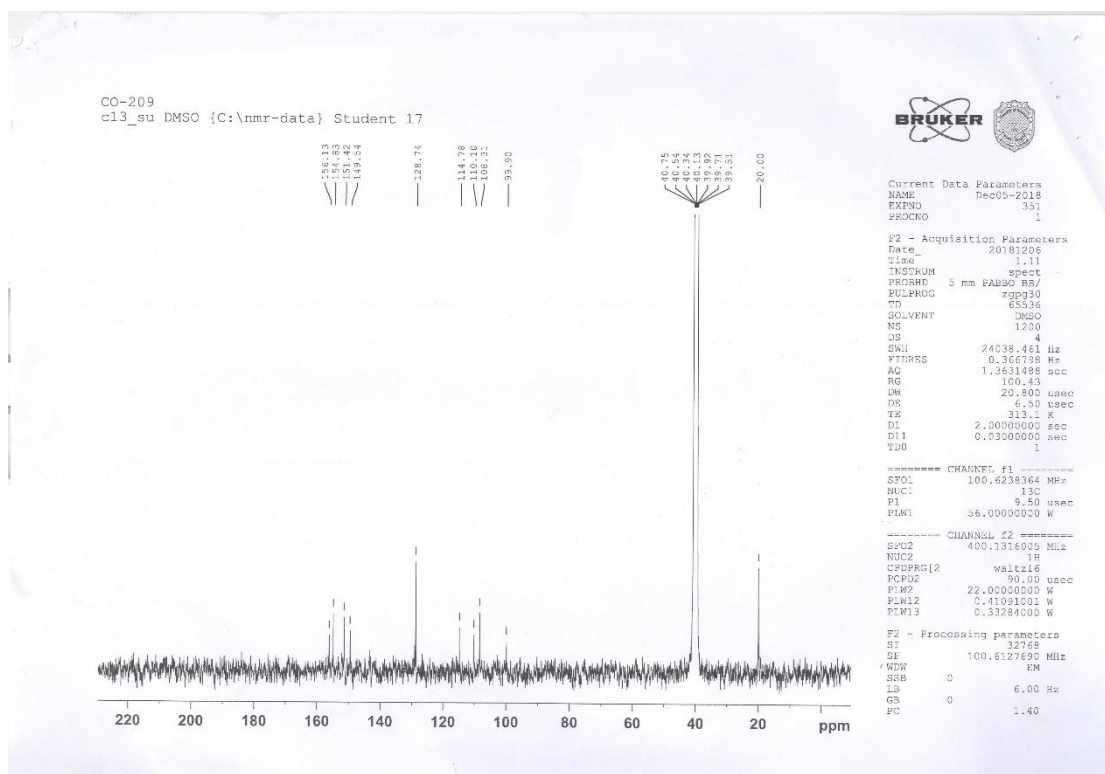

Fig. S4.  $^{13}\text{C}$  NMR of Compound (4)

enas elsayed-EST-6-Hnmr-OW

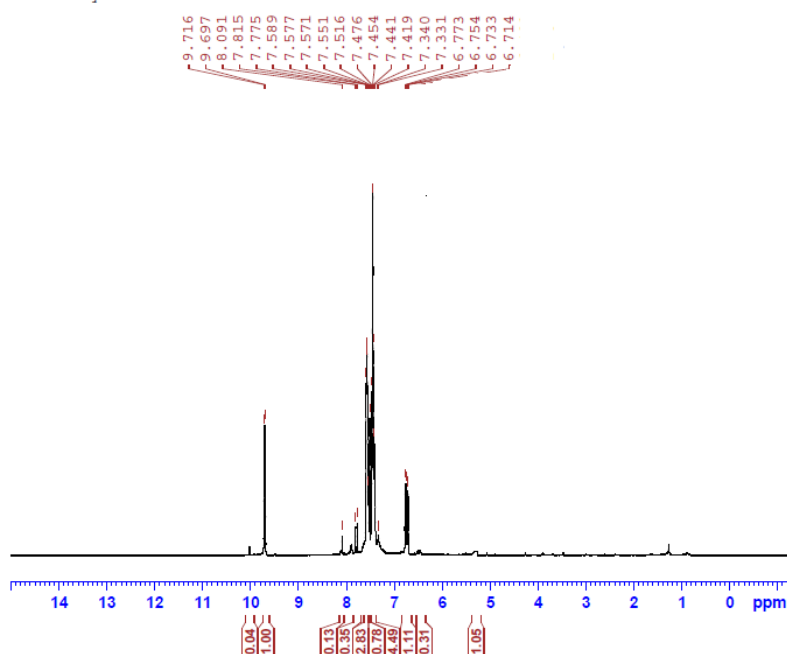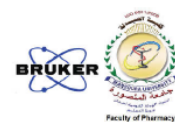

Current Data Parameters  
NAME enas elsayed-EST-6-NMR-OW  
EXPNO 32  
PROCNO 1

F2 - Acquisition Parameters  
Date\_ 20200711  
Time 15.01 h  
INSTRUM spect  
PROBHD Z108618\_0945 (   
PULPROG zg30  
TD 65536  
SOLVENT CDCl3  
NS 16  
DS 2  
SWH 8012.820 Hz  
FIDRES 0.244532 Hz  
AQ 4.0894466 sec  
RG 30.59  
DW 62.400 usec  
DE 6.50 usec  
TE 294.5 K  
D1 1.00000000 sec  
D11 1  
SFO1 400.2024712 MHz  
NUC1 1H  
P1 13.500 usec  
PLM1 13.00000000 W

F2 - Processing parameters  
SI 65536  
SF 400.2000000 MHz  
WDW EM  
SSB 0  
LB 0.30 Hz  
GB 0  
PC 1.00

Fig. S5.  $^1\text{H}$  NMR of Cinnamaldehyde (5)

enas elsayed-EST-6-Cnmr-OW

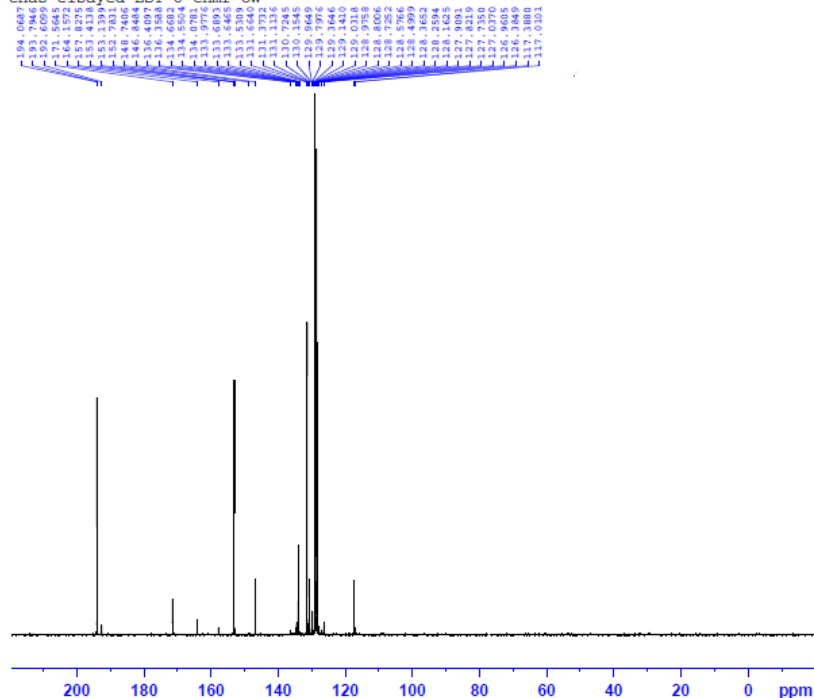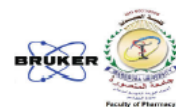

Current Data Parameters  
NAME enas elsayed-EST-6-NMR-OW  
EXPNO 33  
PROCNO 1

F2 - Acquisition Parameters  
Date\_ 20200711  
Time 17.03 h  
INSTRUM spect  
PROBHD Z108618\_0945 (   
PULPROG zgpg30  
TD 65536  
SOLVENT CDCl3  
NS 2100  
DS 4  
SWH 24038.461 Hz  
FIDRES 0.733596 Hz  
AQ 1.3631488 sec  
RG 197.77  
DW 20.800 usec  
DE 6.50 usec  
TE 295.5 K  
D1 2.00000000 sec  
D11 0.03000000 sec  
TD0 1  
SFO1 100.6404331 MHz  
NUC1 13C  
P1 10.00 usec  
PLM1 47.00000000 W  
SFO2 400.2016008 MHz  
NUC2 1H  
CROSSPC12 waltz16  
PCPD2 90.00 usec  
PLM2 13.00000000 W  
PLM12 0.29249999 W  
PLM13 0.14713000 W

F2 - Processing parameters  
SI 32768  
SF 100.6303700 MHz  
WDW EM  
SSB 0  
LB 1.00 Hz  
GB 0  
PC 1.40

Fig. S6.  $^{13}\text{C}$  NMR of Cinnamaldehyde (5)

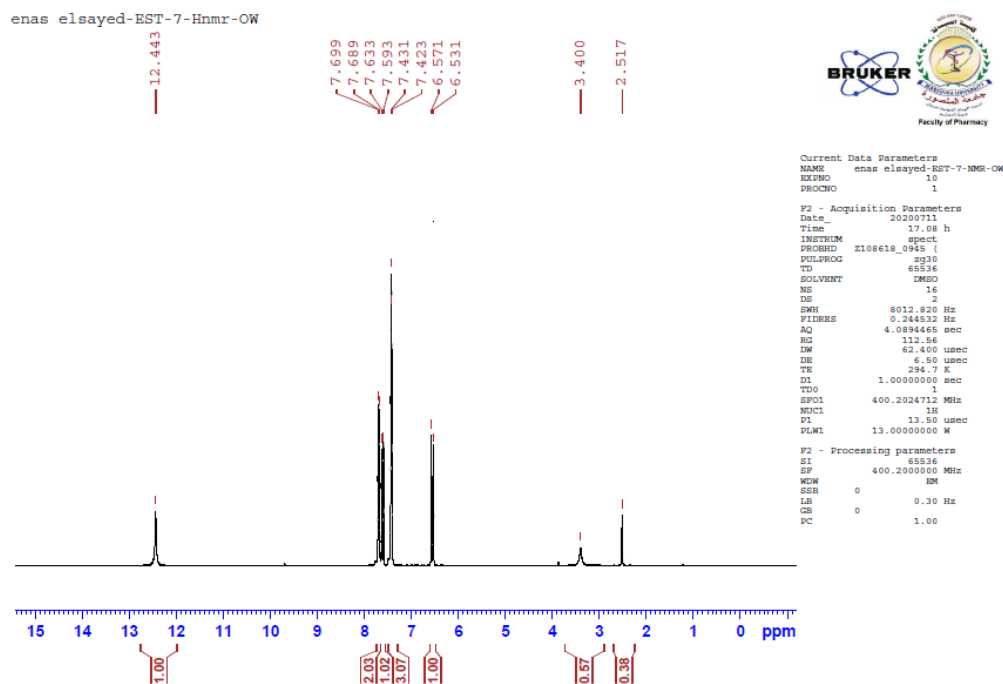

Fig. S7.  $^1\text{H}$  NMR of Cinnamic Acid (6)

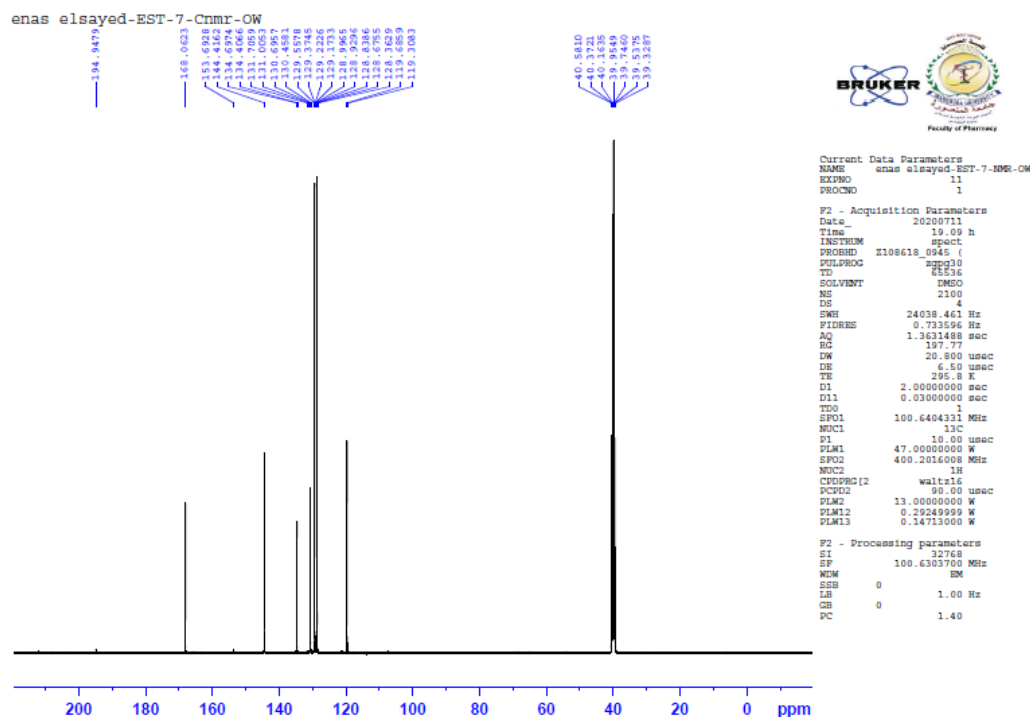

Fig. S8.  $^{13}\text{C}$  NMR of Cinnamic Acid (6)



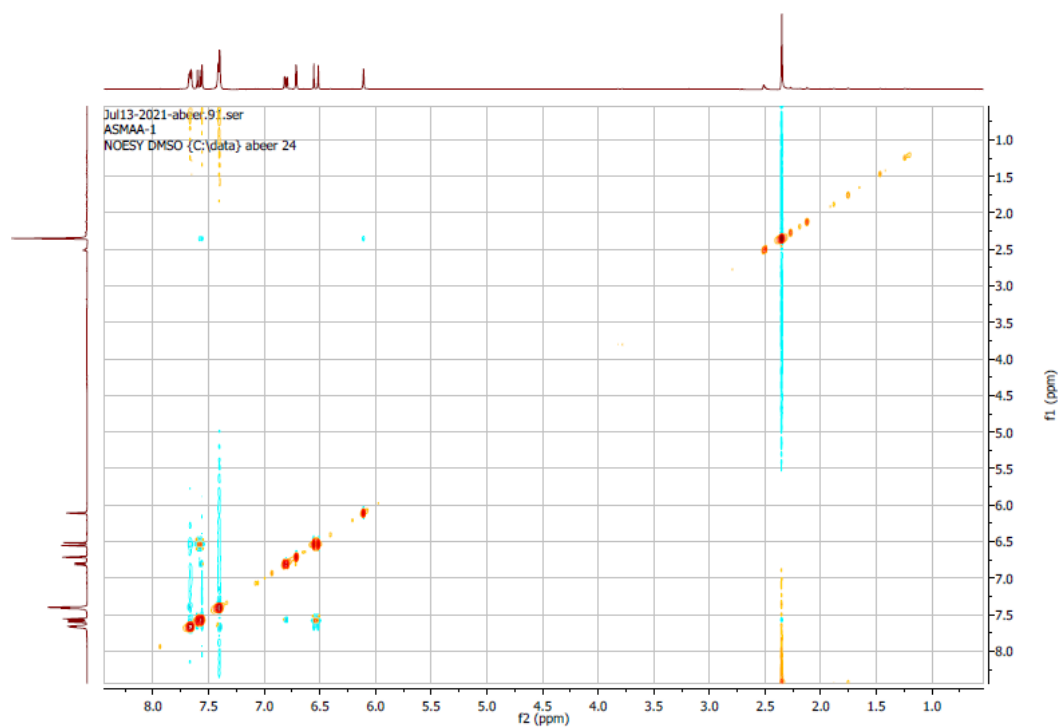

**Fig. S11. NOSY of Compound (8a)**

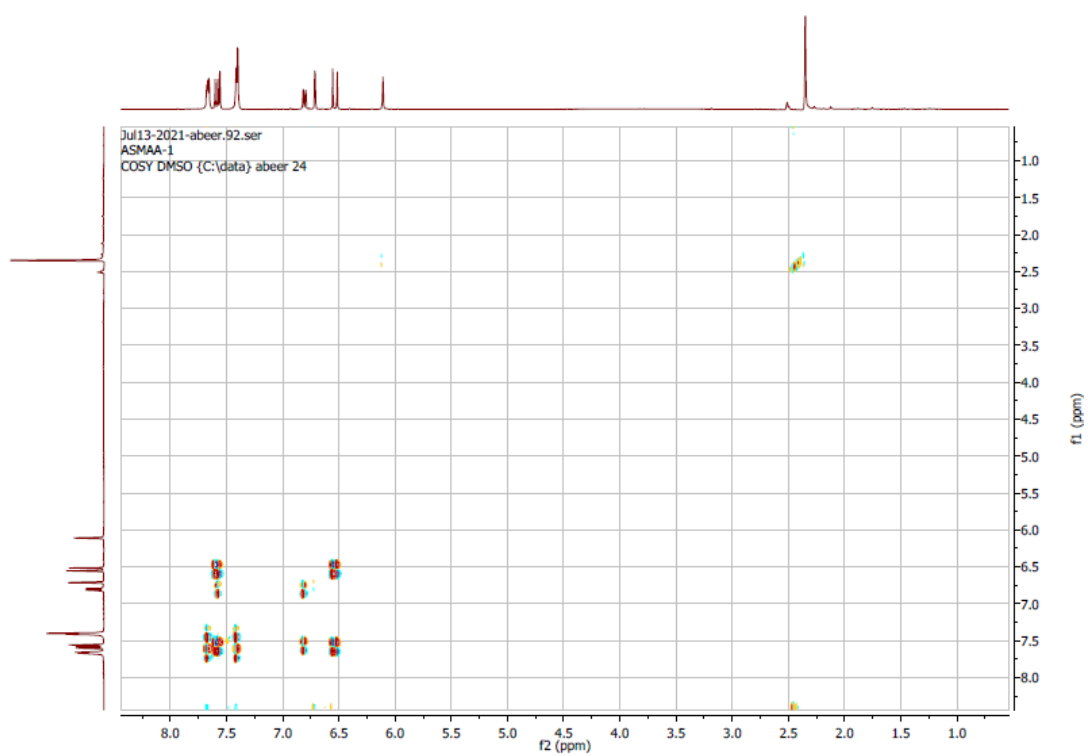

**Fig. S12. COSY of Compound (8a)**

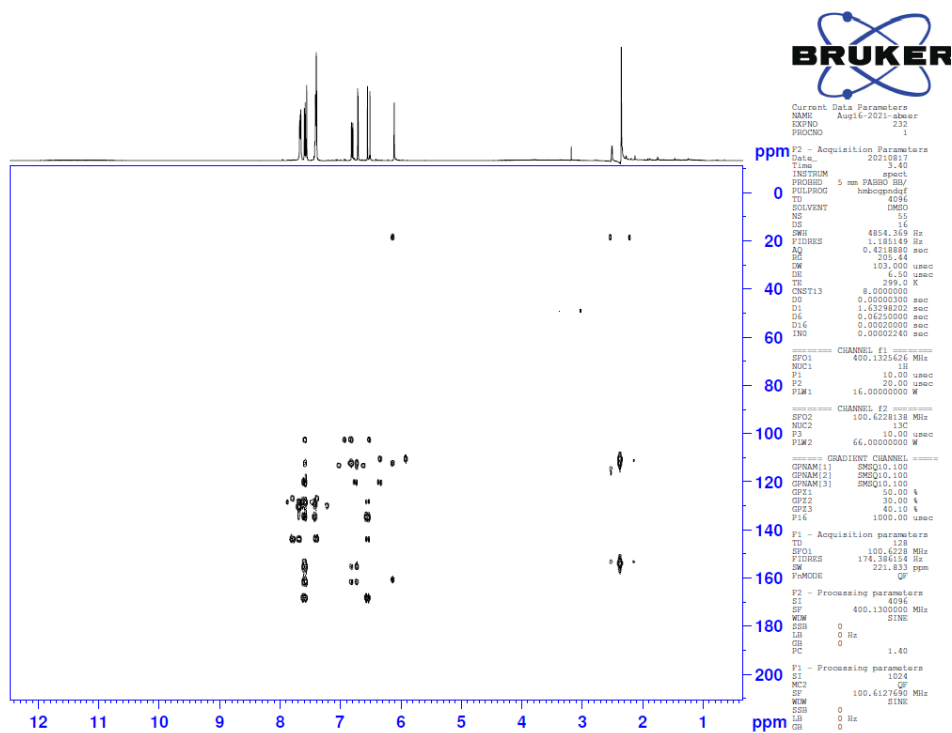

Fig. S13. HMBC of Compound (8a)

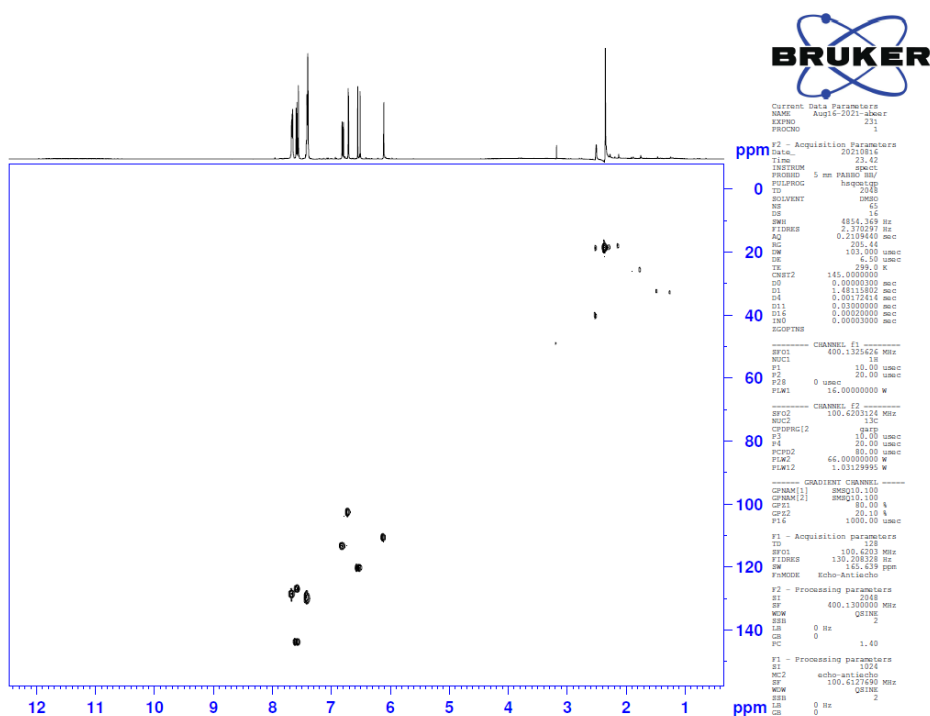

Fig. S14. HSQC of Compound (8a)

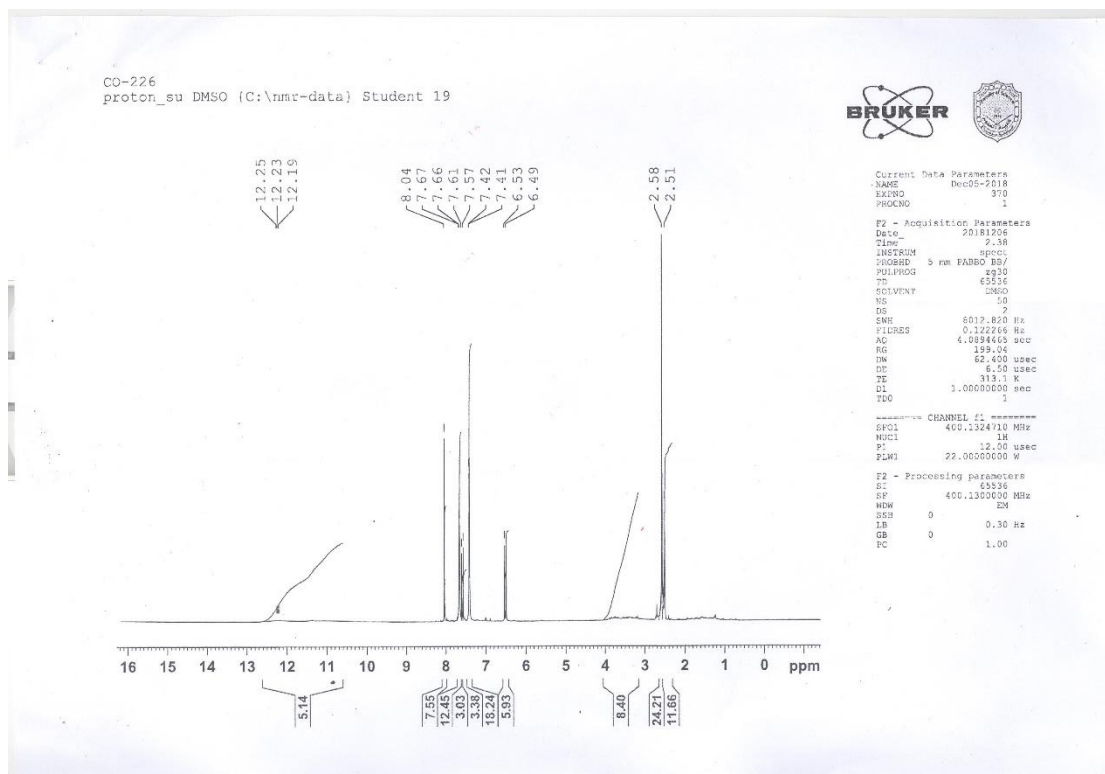

Fig. S15.  $^1\text{H}$  NMR of compound (8b)

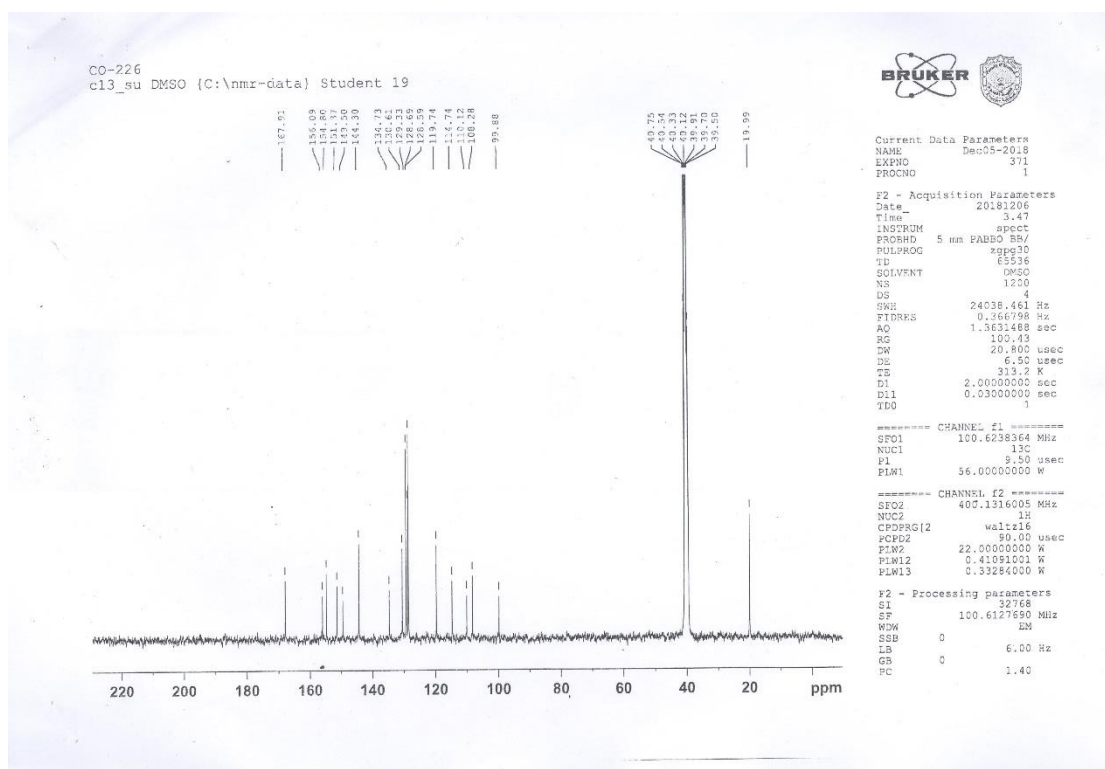

Fig. S16.  $^{13}\text{C}$  NMR of compound (8b)



## Supplementary materials for detailed methodology

### 2.2.2.1. Flow cytometric analysis

#### 2.2.2.1.1. *FITC/Annexin-V-FITC/PI Differential Apoptosis/Necrosis Assessment*

Apoptosis and necrosis cell populations are determined using Annexin V-FITC apoptosis detection kit (Abcam Inc., Cambridge Science Park, Cambridge, UK) coupled with 2 fluorescent channels flowcytometry. After treatment with test compounds for 48 h, cells ( $10^5$  cells) are collected by trypsinization and washed twice with ice-cold PBS (pH 7.4). Then, cells are incubated in dark with 0.5 ml of Annexin V-FITC/PI solution for 30 min in dark at room temperature according to manufacturer protocol. After staining, cells are injected via ACEA Novocyte™ flowcytometer (ACEA Biosciences Inc., San Diego, CA, USA) and analyzed for FITC and PI fluorescent signals using FL1 and FL2 signal detector, respectively ( $\lambda_{ex}/em$  488/530 nm for FITC and  $\lambda_{ex}/em$  535/617 nm for PI). For each sample, 12,000 events are acquired and positive FITC and/or PI cells are quantified by quadrant analysis and calculated using ACEA NovoExpress™ software (ACEA Biosciences Inc., San Diego, CA, USA).

#### 2.2.2.1.2. *DNA Content-Flow Cytometry Aided Cell Cycle Analysis*

After treatment with test compounds for 48 h, cells ( $10^5$  cells) are collected by trypsinization and washed twice with ice-cold PBS (pH 7.4). Cells are re-suspended in two milliliters of 60% ice-cold ethanol and incubated at 4°C for 1 h for fixation. Fixed cells are washed twice again with PBS (pH 7.4) and re-suspended in 1 mL of PBS containing 50  $\mu$ g/mL RNAase A and 10  $\mu$ g/mL propidium iodide (PI). After 20 min of incubation in dark at 37 C, cells are analyzed for DNA contents using flow cytometry analysis using FL2 ( $\lambda_{ex}/em$  535/617 nm) signal detector (ACEA Novocyte™ flowcytometer, ACEA Biosciences Inc., San Diego, CA, USA). For each sample, 12,000 events are acquired. Cell cycle distribution is calculated using ACEA NovoExpress™ software (ACEA Biosciences Inc., San Diego, CA, USA).

#### 2.2.2.1.3. *Caspase- 3/7 green flow cytometry assay*

The ability of compounds **4** and **9** to induce the enzymatic activities of caspase 3/7 in HL60 and HepG2 respectively were assayed using caspase 3/7 green flow cytometry assay method. Briefly, control and the tested compounds treated cells ( $2.5 \times 10^5$ /mL) were rinsed with ice cold PBS, cell lysates were prepared and subsequently protein

concentration was measured. Lysates were combined with reaction buffer and incubated with Caspase 3/7 Detection Reagent (specific colorimetric substrates) at 37 °C for 6 h. The samples were estimated at  $\lambda$  488 nm in BD FACS Calibur flow cytometer.

### 2.2.2.3. Immunoblotting (western plot) for PI3K and AKT

Untreated and treated HL-60 and HepG2 cancer cells were treated with compound **4** ( $IC_{50}$ =8.09  $\mu$ M, 48 h) and compound **9** ( $IC_{50}$ =13.14  $\mu$ M, 48 h), respectively were washed in PBS and lysed in boiling sample buffer (62.5 mM Tris-HCl pH 6.8, 1% SDS, 10% glycerol, and 5%  $\beta$ -mercaptoethanol) for sodium dodecyl sulfate polyacrylamide gel electrophoresis (SDS-PAGE). The lysates were boiled for 5 min with lamellae buffer, and the proteins will be separated by SDS-PAGE and transferred to an Immobilon membrane (Millipore). The antibodies used will be antigen affinity-purified polyclonal sheep IgG anti-human annexin V (R&D Systems). After incubation in 5% non-fat dry milk, Tris-HCL, 0.1% Tween 20 for 1 hr, p-PI3K and p-AKT primary antibodies were added to one of the membranes containing specimen samples and incubated at 4 °C overnight. Appropriate secondary antibodies were incubated for 2 hr at room temperature. After being washed twice n 1 x TBS-T, densitometric analysis of the immunoblots was performed to quantify the amounts of p-PI3K and p-AKT against control sample by total protein normalization by Image analysis software on the ChemiDoc MP imaging system (version 3) produced by Bio-Rad (Hercules, CA). (Tantawy et al 2020)

**Table S1.** Docked interaction analysis of synthesized ligands screened with the two proteins (PI3K and AKT1).

| Ligands | Receptor (Protein) | binding free energy (kcal/mol) | Number of H-bonds | Active site residues                 | Bonds length (Å)             |
|---------|--------------------|--------------------------------|-------------------|--------------------------------------|------------------------------|
| 3       | PI3K               | -9.13                          | 2                 | Val882<br>Lys833                     | 2.06<br>2.32                 |
|         | AKT1               | -9.60                          | 4                 | Asp292<br>Ala230<br>Met227<br>Lys179 | 1.77<br>2.13<br>2.76<br>2.49 |
| 4       | PI3K               | -11.80                         | 3                 | Lys833<br>Asp841<br>Val882           | 1.98<br>2.60<br>1.98         |
|         | AKT1               | -13.27                         | 6                 | Lys179<br>Ala230<br>Thr211           | 1.98<br>2.45<br>2.65         |

|                                     |      |        |   |                                                                    |                                                      |
|-------------------------------------|------|--------|---|--------------------------------------------------------------------|------------------------------------------------------|
|                                     |      |        |   | Glu228<br>Asp202<br>Asp274                                         | 2.90<br>3.00<br>3.03                                 |
| <b>6</b>                            | PI3K | -9.18  | 2 | Lys833<br>Val882                                                   | 2.04 -<br>2.52<br>3.17                               |
|                                     | AKT1 | -10.02 | 3 | Lys179<br>Ala230<br>Met227                                         | 2.29<br>1.88<br>3.78                                 |
| <b>8a</b>                           | PI3K | -12.30 | 2 | Val882<br>Lys833                                                   | 2.08<br>2.05                                         |
|                                     | AKT1 | -10.06 | 3 | Ala230<br>Lys276<br>Gly157                                         | 3.20<br>2.30<br>2.33                                 |
| <b>8b</b>                           | PI3K | -13.00 | 4 | Asp964<br>Cys869<br>Lys833<br>Val882                               | 3.38<br>3.72<br>2.28<br>2.19                         |
|                                     | AKT1 | -10.89 | 6 | Lys179<br>Asn279<br>Asp292<br>Gly157<br>Met281<br>Glu228<br>Ala230 | 2.63<br>3.44<br>2.35<br>3.57<br>2.96<br>3.01<br>3.65 |
| <b>8c</b>                           | PI3K | -12.76 | 1 | Val882                                                             | 2.05                                                 |
|                                     | AKT1 | -10.16 | 2 | Lys179<br>Glu228                                                   | 1.83<br>2.16                                         |
| <b>Staurosporine</b>                | PI3K | -14.07 | 2 | Val882<br>Lys833                                                   | 1.89<br>1.76                                         |
| <b>Spirochromane<br/>derivative</b> | AKT1 | -14.90 | 6 | Asp292<br>Glu228<br>Ala230<br>Phe161                               | 1.60<br>2.04<br>2.58<br>2.12<br>2.10<br>2.40         |
